# Supplementary material for: A facile nanocasting strategy to nitrogen-doped porous carbon monolith by treatment with ammonia for efficient oxygen reduction
Source: Royal Society of Chemistry journal article supplement (doi:10.1039/c5ta01679g), 2015-01-01
Supplement: c5ta01679g1.pdf [file c5ta01679g1.pdf]

## **Supporting Information:**

### **A Facile Nanocasting Strategy to Nitrogen-Doped Hierarchically Porous Carbon Monolith by Treatment with Ammonia for Efficient Oxygen Reduction**

Jiacheng Wang,<sup>a,b,c\*</sup> Ruguang Ma,<sup>a,b,c</sup> Yao Zhou,<sup>a,b,c</sup> and Qian Liu<sup>a,b,c\*</sup>

<sup>a</sup>State Key Laboratory of High Performance Ceramics and Superfine Microstructure, Shanghai Institute of Ceramics, 1295 Dingxi Road, Shanghai 200050, P. R. China. [jiacheng.wang@mail.sic.ac.cn](mailto:jiacheng.wang@mail.sic.ac.cn); [qianliu@sunm.shcnc.ac.cn](mailto:qianliu@sunm.shcnc.ac.cn)

<sup>b</sup>Innovation Center for Inorganic Materials Genomic Science, Shanghai Institute of Ceramics, Shanghai 200050, P. R. China.

<sup>c</sup>Shanghai Institute of Materials Genome, Shanghai, P. R. China.

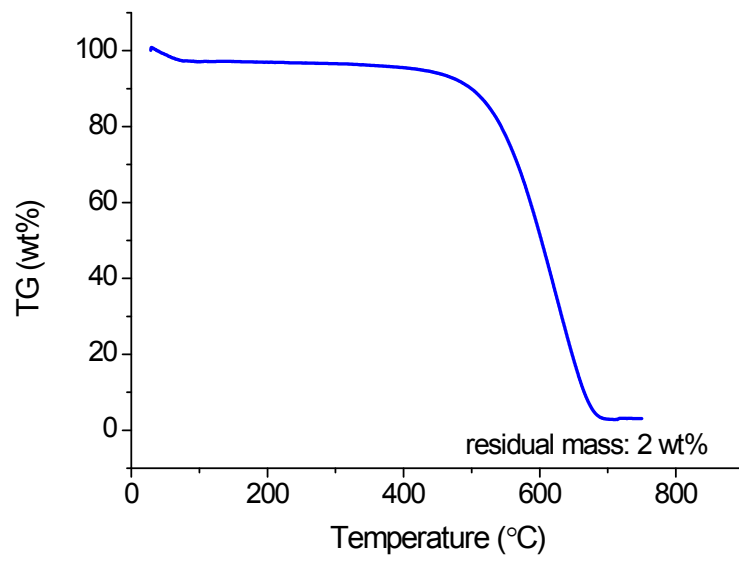

**Fig. S1** TG curves of NCM-850 in an air flow. This result implies that the silica framework was completely removed in the final carbon monolith.

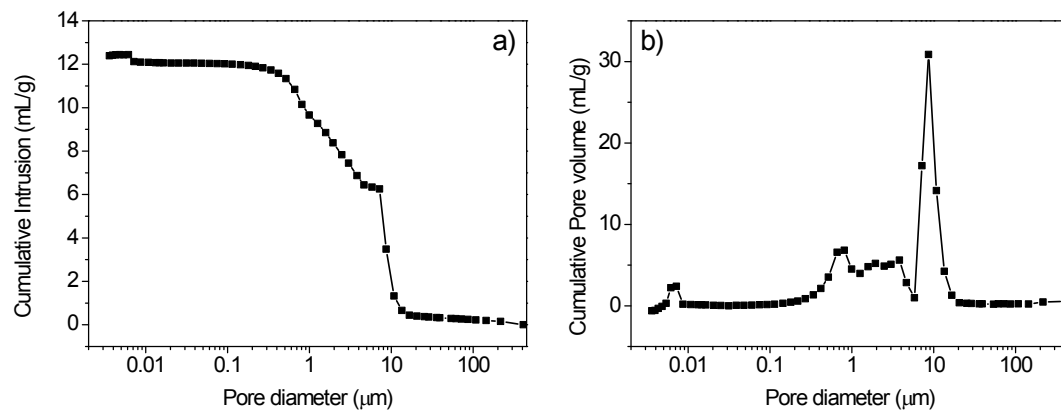

**Fig. S2** Mercury intrusion curve (a) and pore diameter distribution (b) for the parent silica monolith (SM). The measured macropore volume is 12.4 mL/g, and the macropore diameter is 8.5 μ m.

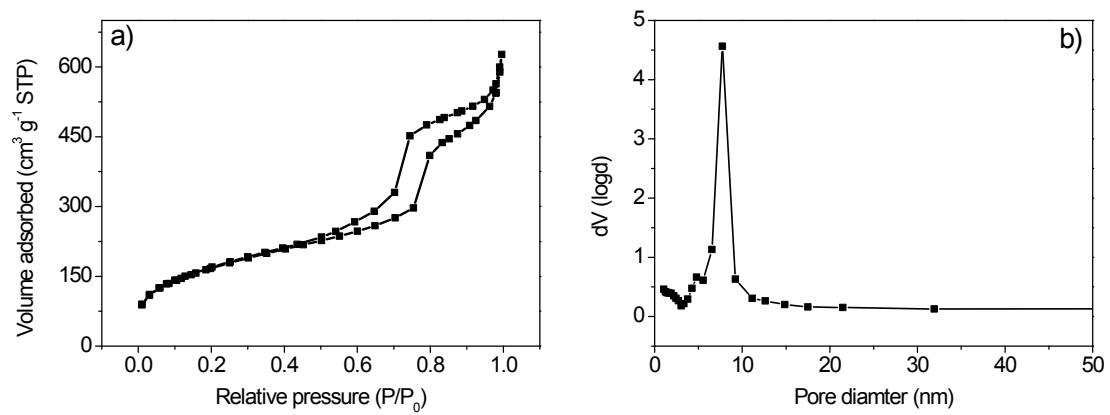

**Fig. S3** Nitrogen adsorption-desorption isotherms (a) and pore size distribution (b) for the parent SM.

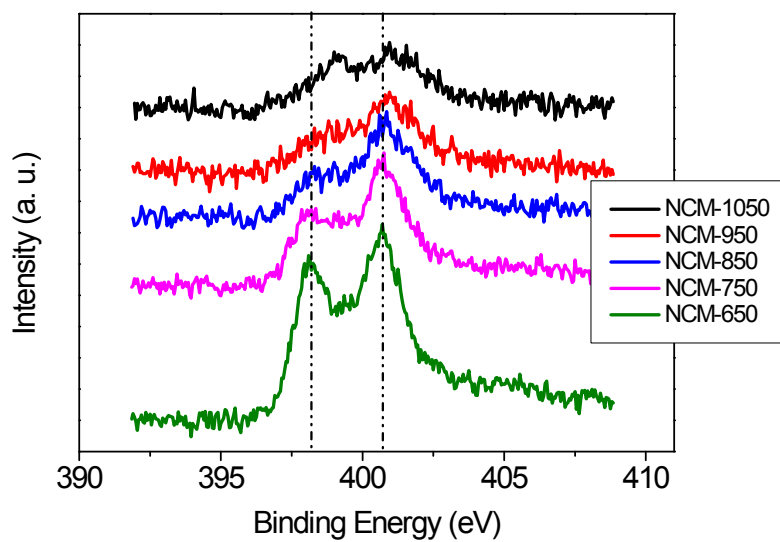

**Fig. S4** The N1s XPS spectra for all NCMs prepared at different pyrolysis temperatures.

**Table S1.** The C, N, O contents of the NCMs determined by XPS analysis and the calculated corresponding N/C, O/C and (N+O)/C atom ratios.

| Samples  | C (at%) | N (at%) | O (at%) | N/C   | O/C   | (O+N)/C |
|----------|---------|---------|---------|-------|-------|---------|
| NCM-650  | 90.8    | 4.7     | 3.92    | 0.052 | 0.043 | 0.095   |
| NCM-750  | 90.6    | 3.3     | 5.43    | 0.036 | 0.06  | 0.096   |
| NCM-850  | 90.6    | 2.3     | 6.37    | 0.025 | 0.07  | 0.095   |
| NCM-950  | 92.5    | 1.7     | 5.02    | 0.018 | 0.054 | 0.072   |
| NCM-1050 | 93.7    | 1.6     | 3.94    | 0.017 | 0.042 | 0.059   |

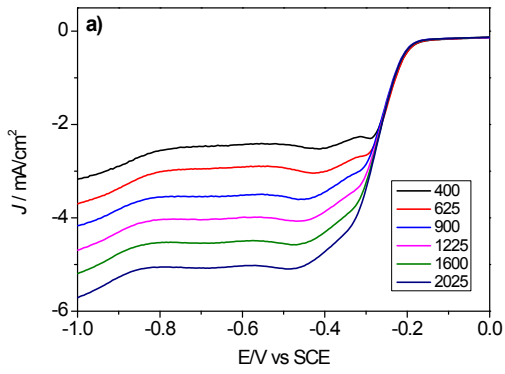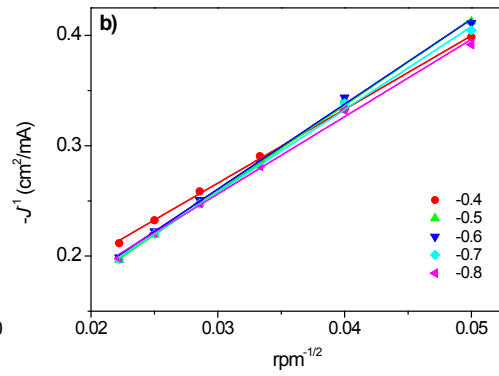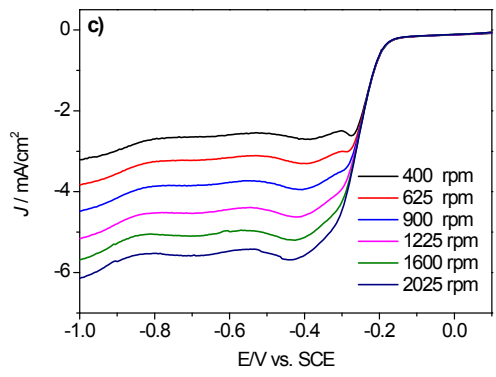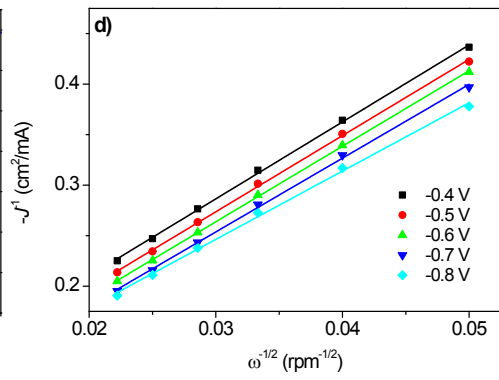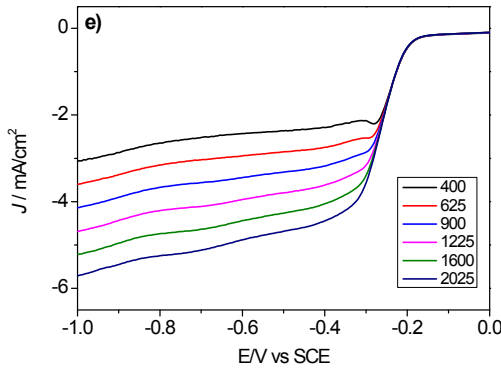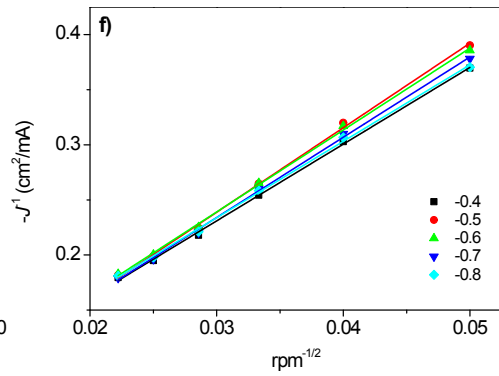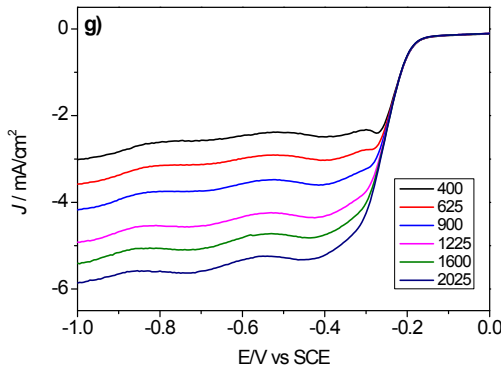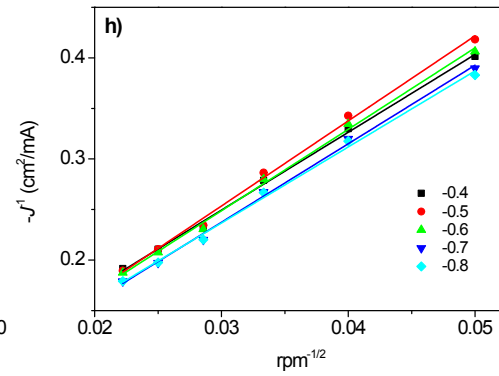

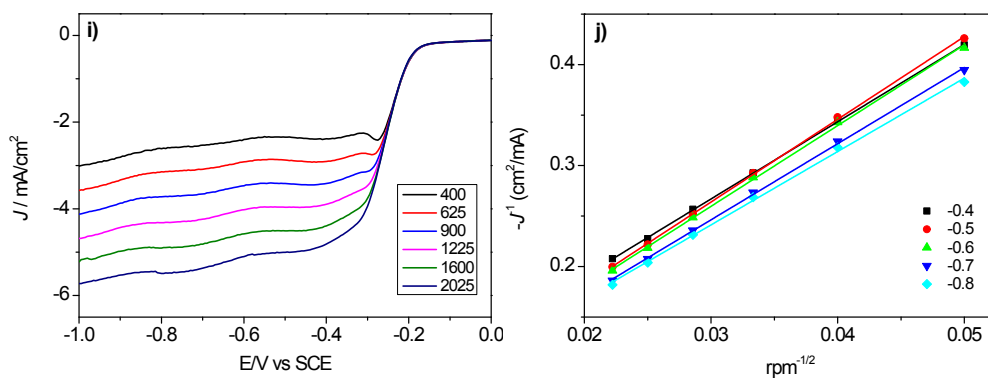

**Fig. S5** LSV curves (a, c, e, g, i) and the calculated Koutecky-Levich (K-L) plots (b, d, f, h, j) of NCM-650 (a, b), NCM-750 (c, d), NCM-850 (e, f), NCM-950 (g, h), and NCM-1050 (i, j) in O<sub>2</sub>-saturated 0.1 M KOH solution at rotating speeds of 400~2025 rpm (sweep rate: 5 mV/s).



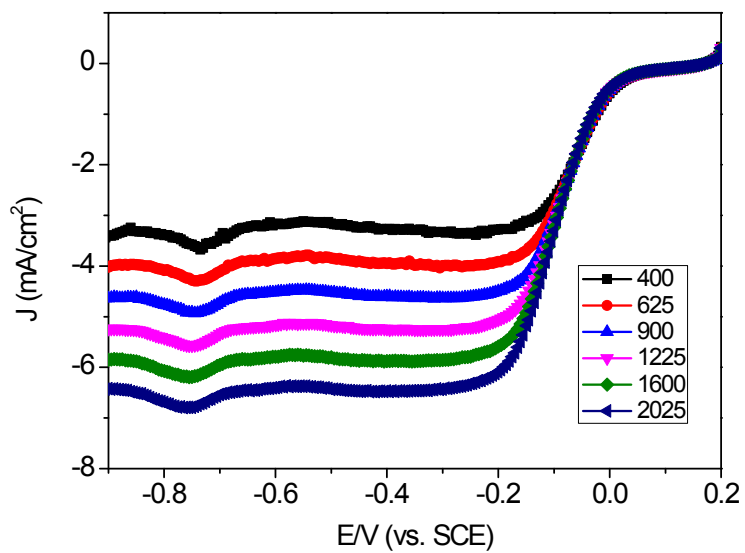

**Fig. S6** LSVs of 40% Pt/C in O<sub>2</sub>-saturated 0.1 M KOH solution at different rotating speeds of 400~2025 rpm (sweep rate: 5 mV/s).

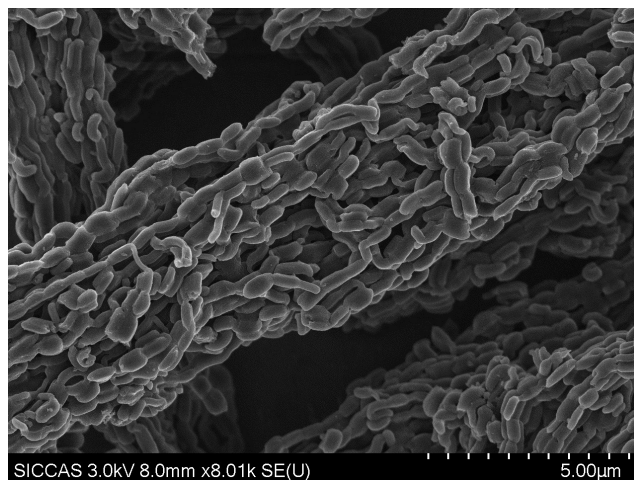

**Fig. S7** SEM image of N-CMK-3, implying that it is composed of sub-micrometer-sized aggregated rod-like particles, greatly different from that of NCMs.
